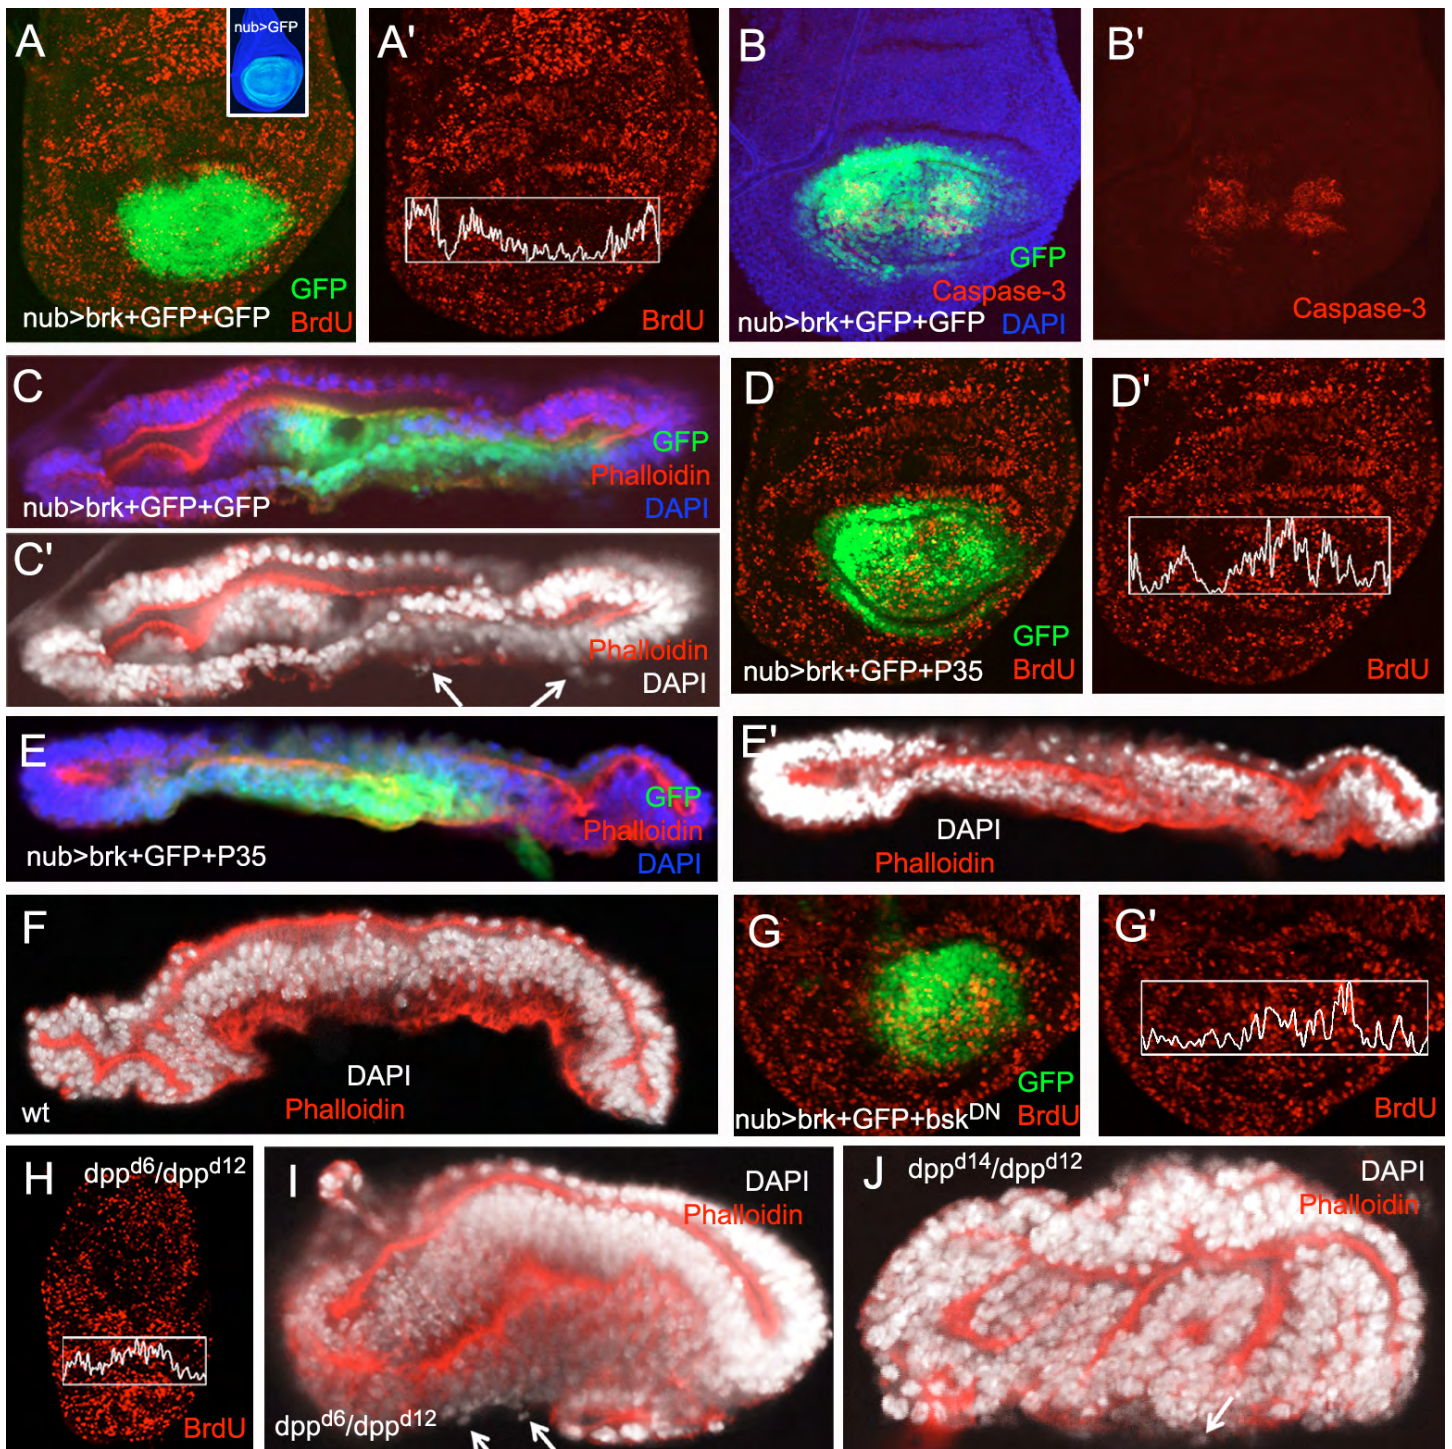

**Fig. S1. *nub>brk* induces apoptosis and defective cell/tissue morphogenesis.** (C,E-G,I,J) Transverse sections (*x-z* images). Arrows indicate extruded cells. (A-C') Expressing *brk* by *nub*-Gal4 induced decreased proliferation (A), cell death (B) and changes in tissue morphogenesis as well as cell extrusion (C). Inset in A shows the *nub*-Gal4 expression pattern. (D-G') Repressing cell death rescued the defect in proliferation (D,G) but not in tissue morphogenesis (E). Wild-type control (F). (H-J) *dpp* mutant wing discs showed medially enhanced proliferation (H) along with extrusion of cells and disruption of normal tissue morphology (I,J).

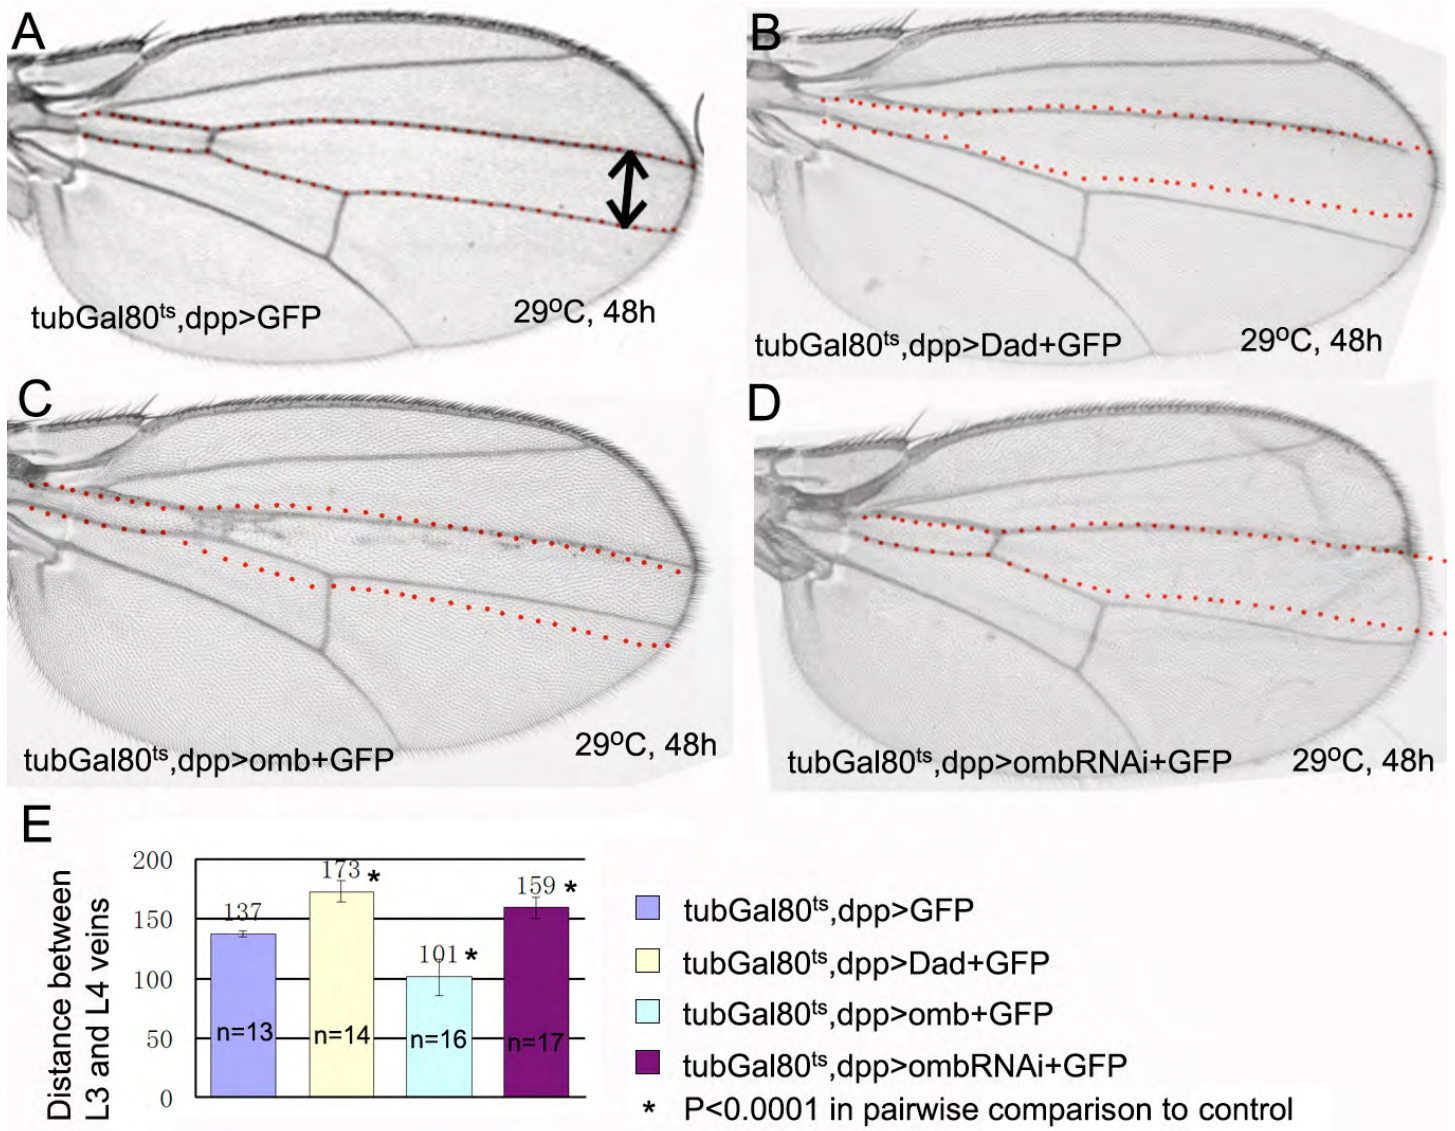

**Fig. S2. Attenuated Dpp-Omb signaling increases the distance between L3 and L4 in the adult wing.** Red dotted lines outline the normal position of L3 and L4 as observed in the control wing. (A) Control wing. (B) Repression of Dpp signaling by expressing *Dad* in the *dpp*-Gal4 domain increased the distance between L3 and L4. (C) Expressing *omb* in the *dpp*-Gal4 domain reduced the distance between L3 and L4. (D) Repression of *omb* in the *dpp*-Gal4 domain increased the distance between L3 and L4. (E) Statistics of the L3-L4 distance measurements (in arbitrary units). *t*-tests of pairwise comparisons showed significant differences between control and the three experimental genotypes ( $P<0.0001$ ). Error bars indicate s.d.

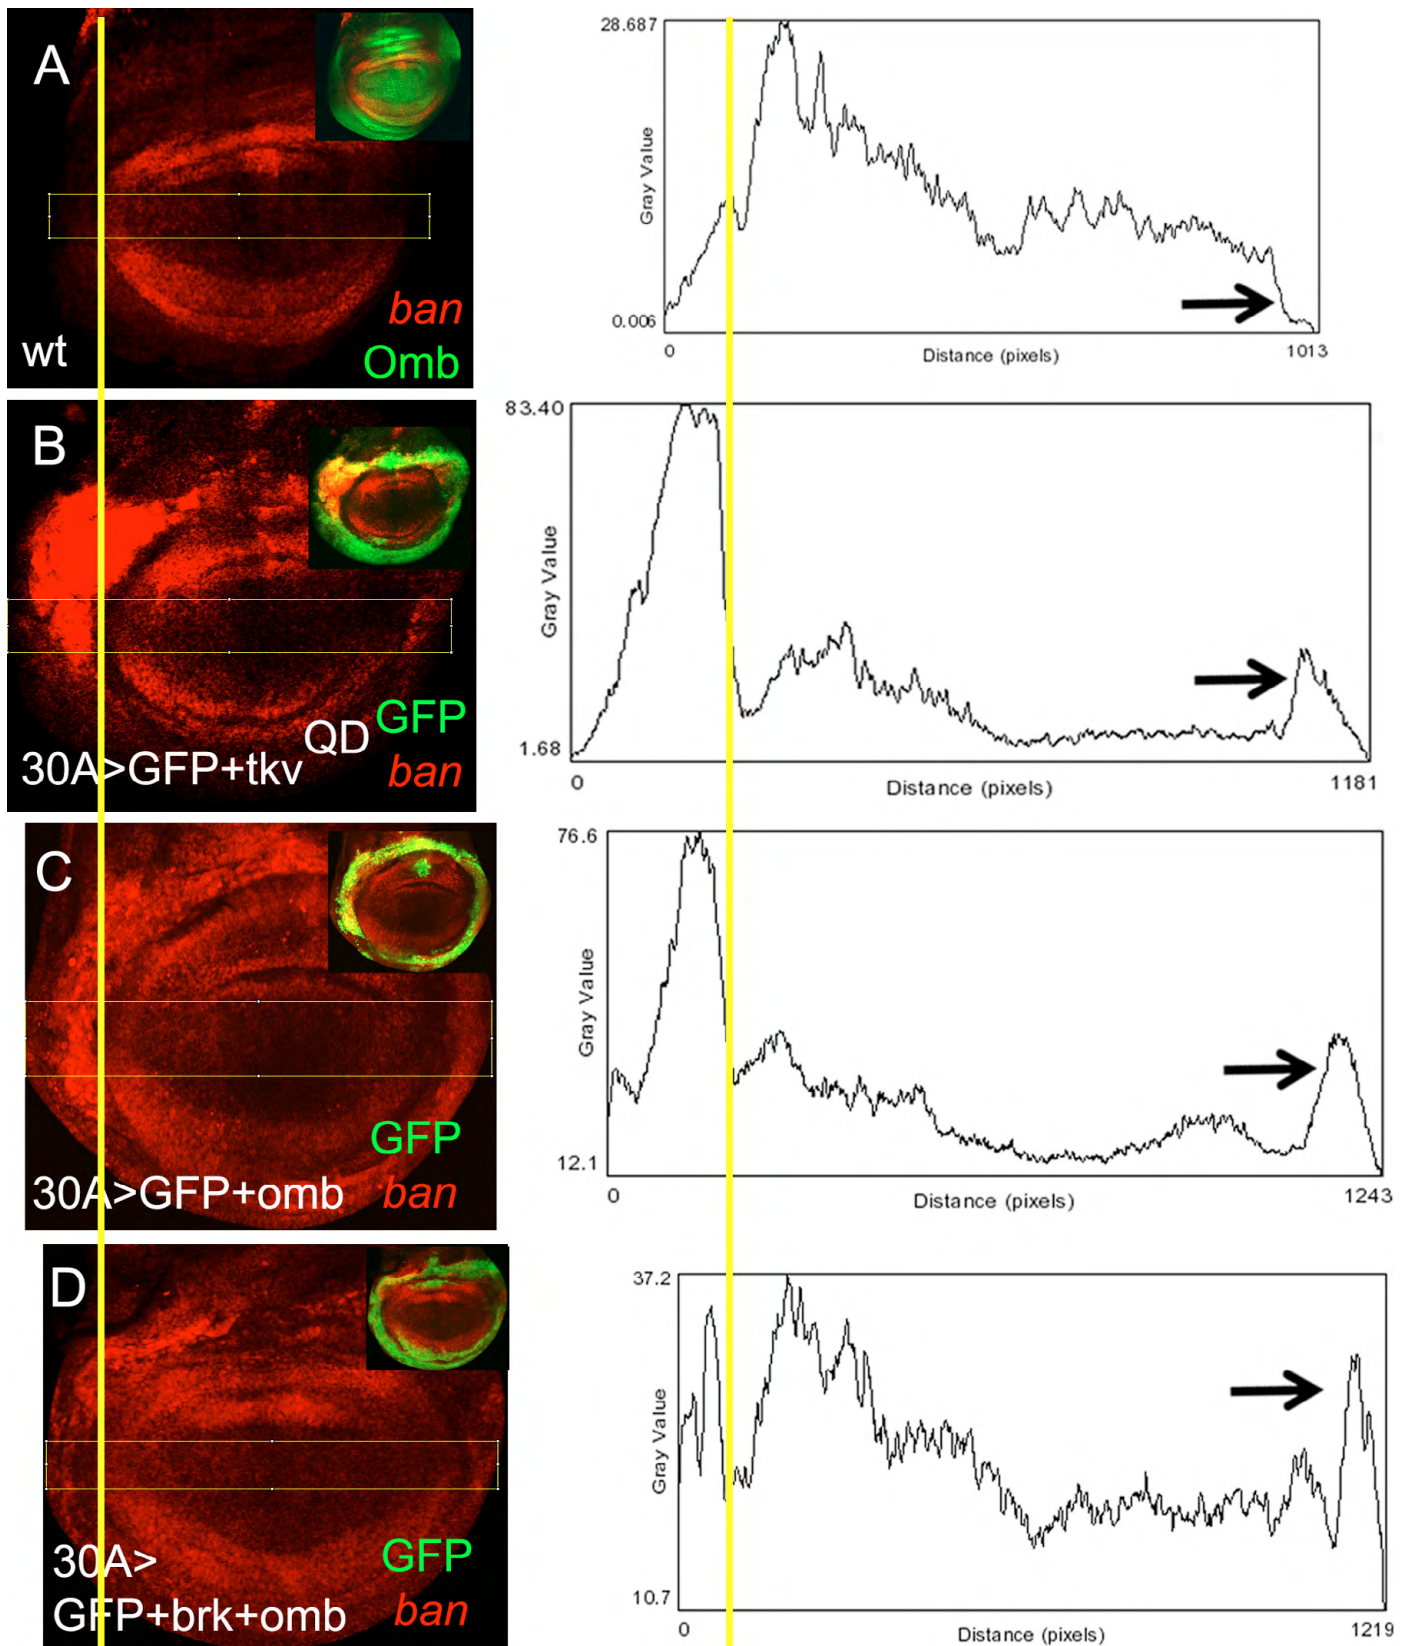

**Fig. S3. Quantification of *ban* expression.** Omb or Dpp signaling was manipulated in the 30A-Gal4 domain as indicated. A to D correspond to A, C, D and E of Fig. 3. Fluorescence intensities were measured (by ImageJ) in the boxed regions. Panels are oriented such that the anterior hinge-pouch fold is in vertical register (yellow line). (A) Low *ban* expression in lateral wing disc. (B) Lateral Tk $v^{QD}$  induced *ban* expression in the lateral wing disc. Upregulated *ban* only occurred in the lateral regions where *omb* was elevated, but not in pleura and medial hinge where *omb* was not induced. (C) 30A>*omb* induced *ban* expression in the entire 30A-Gal4 domain. (D) When *brk* and *omb* were co-expressed, *ban* was still upregulated laterally. Note that the 30A-Gal4 activity in D was weaker than in B and C. *brk* overexpression apparently attenuated 30A-Gal4 activity. In all three 30A-Gal4-driven experiments, lateral upregulation of *ban* by Tk $v^{QD}$  or Omb was stronger anteriorly than posteriorly, which reflects lateral differences in Gal4 activity (see insets in B-D). This also implies that *ban* is sensitive to the level of Omb in the lateral wing.

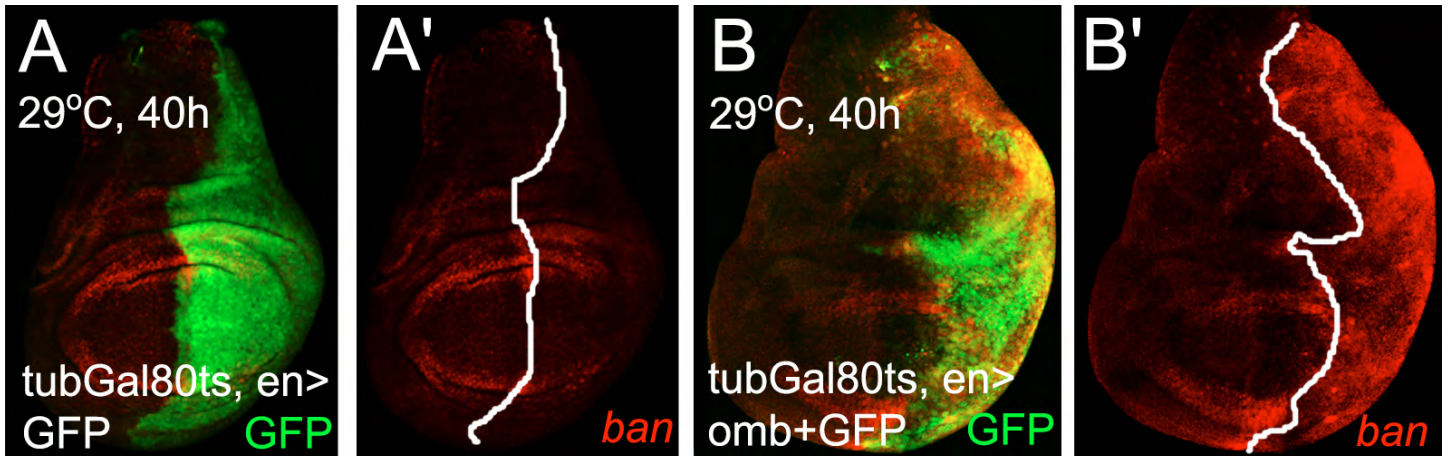

**Fig. S4. *Omb* induces *ban* expression in the lateral wing.** (A,A') Control experiment. (B,B') Expressing *omb* by en-Gal4 under temporal Gal80<sup>ts</sup> control for 40 hours induced the elimination of posterior pouch and enhanced lateral *ban* expression.
